# Supplementary material for: Associations between environmental factors and hospital admissions for sickle cell disease
Source: PubMed Central journal article supplement — Haematologica. 2016 Dec 1;102(4):666–75. doi: 10.3324/haematol.2016.154245 (PMC5395107; doi:10.3324/haematol.2016.154245), 2017-04
Supplement: 2016_154245-Disclosures_and_Contributions.pdf [file 2016_154245-Disclosures_and_Contributions.pdf]

Haematologica  
HAEMATOL/2016/154245  
Version 3

Associations between environmental factors and hospital admissions  
for sickle cell disease

Frédéric B. Piel, Sanjay Tewari, Valentine Brousse, Antonis Analitis,  
Anna Font, Stephan Menzel, Subarna Chakravorty, Swee Lay Thein,  
Baba Inusa, Paul Telfer, Marianne de Montalembert, Gary W. Fuller,  
Klea Katsouyanni, and David C. Rees

Disclosures: This study had no specific funding. The authors would like to thank the Stroke Association for supporting some of the work involved in this study, although this Association had no role in study design, data collection and analysis, decision to publish, or preparation of the manuscript. All authors have completed the ICMJE uniform disclosure form at [www.icmje.org/coi\\_disclosure.pdf](http://www.icmje.org/coi_disclosure.pdf) and declare: no support from any organization for the submitted work. FBP received personal fees from Novartis. TP received personal fees from GBT440, Terumo, Apopharma and Bluebird Bio. MdM received grants, personal fees and non-financial support from Novartis, as well as grants and personal fees from Addmedica. DCR received grants and personal fees from Novartis and non-financial support from Eli Lilly.

Contributions: FBP, GWF and DCR were responsible for the study concept and design. ST, VB, AF, VG, BI, PT, MdM were involved in data acquisition. All authors were involved in analysis and interpretation of data. FBP and DCR drafted the manuscript, and all authors revised it critically for important intellectual content. FBP and DCR had full access to all of the data in the study.
